# Supplementary material for: Enabling high-performance room-temperature sodium/sulfur batteries with few-layer 2H-MoSe2embellished nitrogen-doped hollow carbon spheres as polysulfide barriers
Source: Royal Society of Chemistry journal article supplement (doi:10.1039/d0ta10159a), 2020-12-29
Supplement: d0ta10159a1.pdf [file d0ta10159a1.pdf]

## *Supplementary Information*

### **Enabling high-performance room-temperature sodium/sulfur batteries with few-layer 2H-MoSe<sub>2</sub> embellished nitrogen-doped hollow carbon spheres as polysulfide barrier**

Chunwei Dong,<sup>‡</sup> Hongyu Zhou,<sup>‡</sup> Bo Jin<sup>\*</sup>, Wang Gao, Xingyou Lang, Jianchen Li and Qing Jiang<sup>\*</sup>

*Key Laboratory of Automobile Materials, Ministry of Education, School of Materials Science and Engineering, Jilin University, Changchun 130022, China*

*E-mail: jinbo@jlu.edu.cn; jiangq@jlu.edu.cn*

<sup>‡</sup> Chunwei Dong and Hongyu Zhou contributed equally to this work.

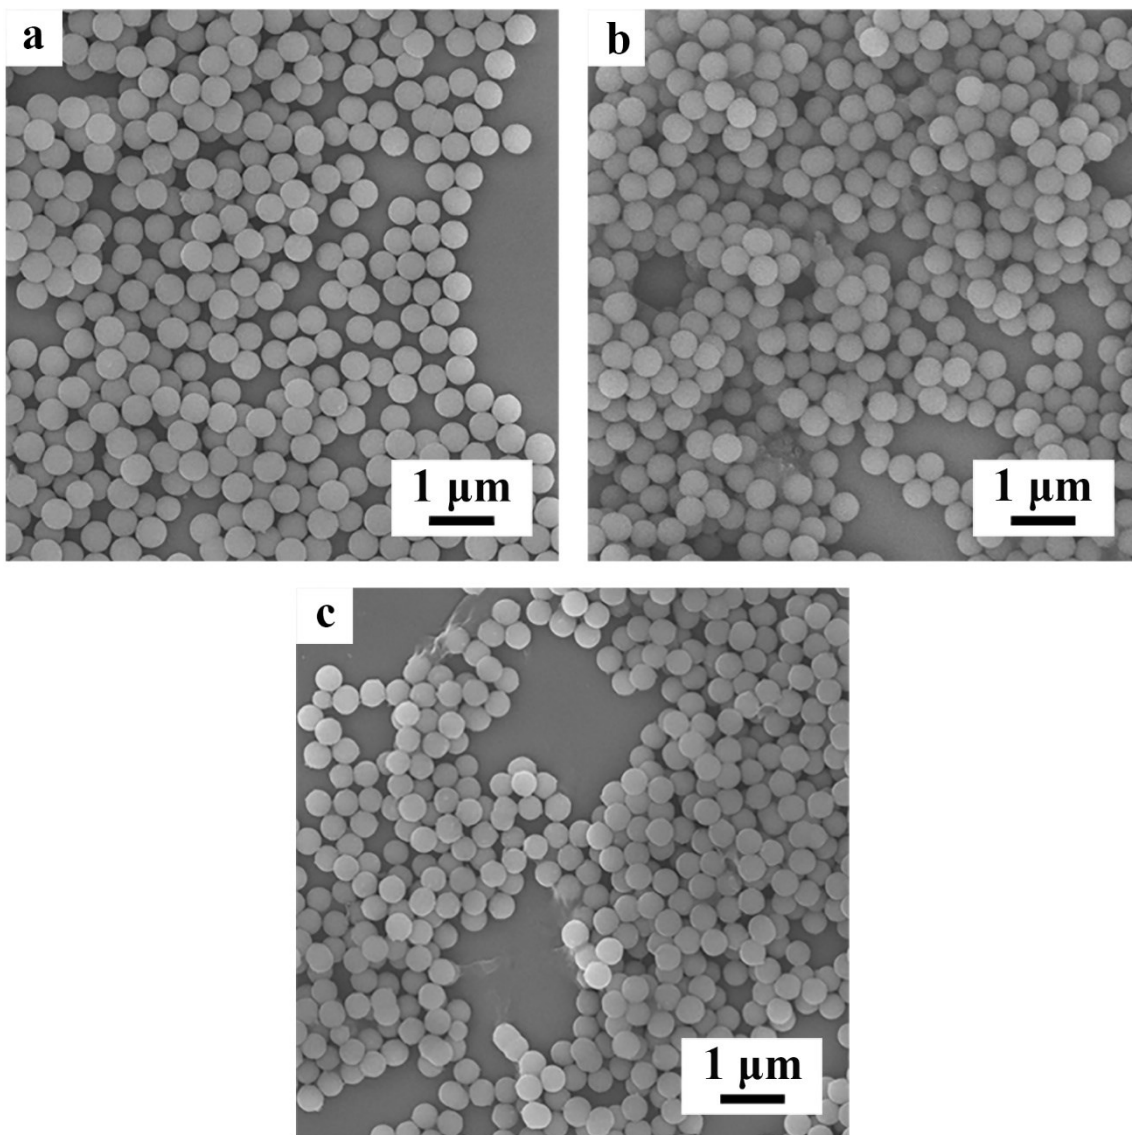

Fig. S1 Low-magnification FESEM images of (a) SiO<sub>2</sub>, (b) SiO<sub>2</sub>@C, and (c) N-HCS.

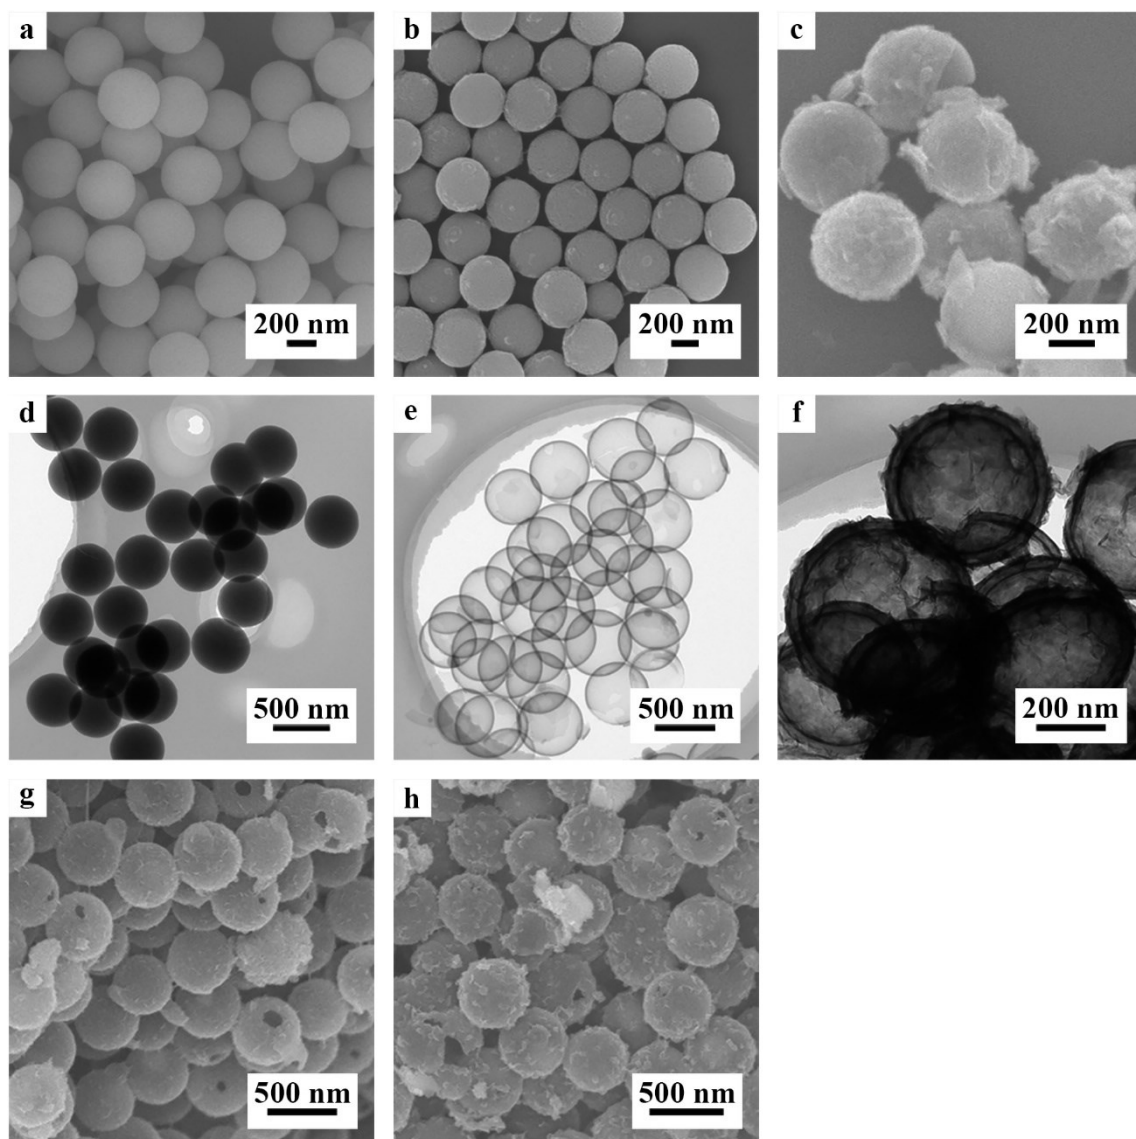

Fig. S2 (a-c) FESEM and (d-f) TEM images of SiO<sub>2</sub>, N-HCS, and S/2H-MoSe<sub>2</sub>/N-HCS. Low-magnification FESEM images of (g) 2H-MoSe<sub>2</sub>/N-HCS and (h) S/2H-MoSe<sub>2</sub>/N-HCS.

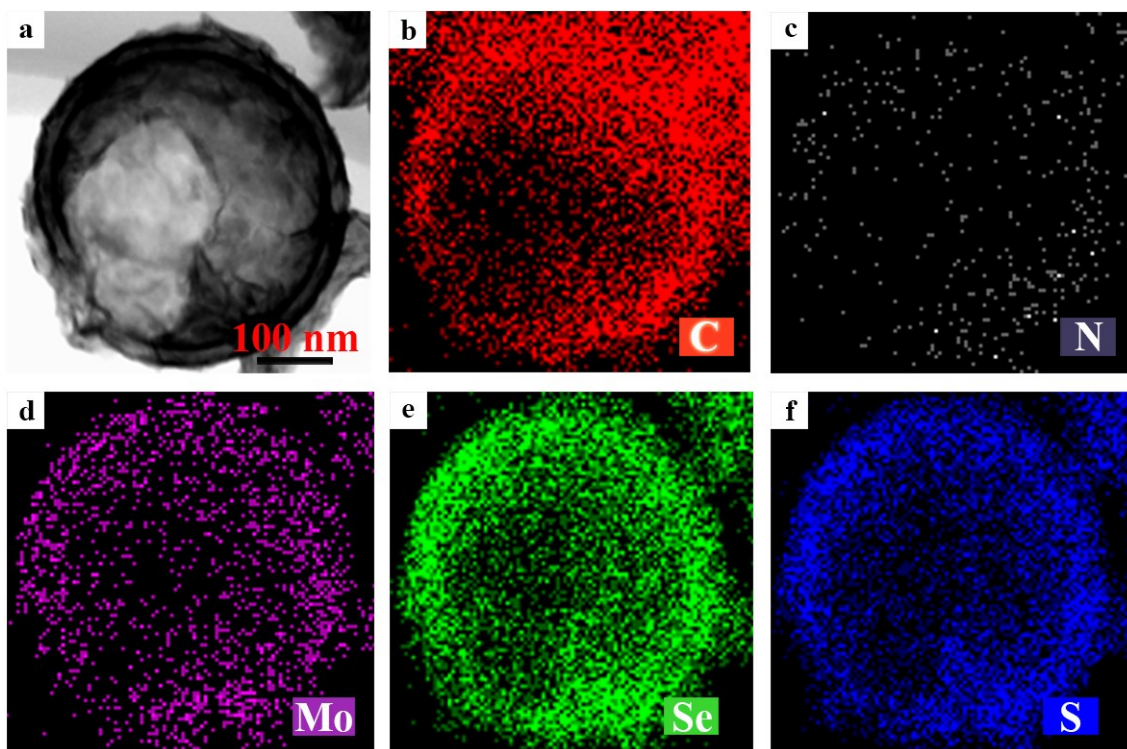

Fig. S3 (a) STEM image of S/2H-MoSe<sub>2</sub>/N-HCS. (b-f) Element distribution mappings of C, N, Mo, Se, and S.

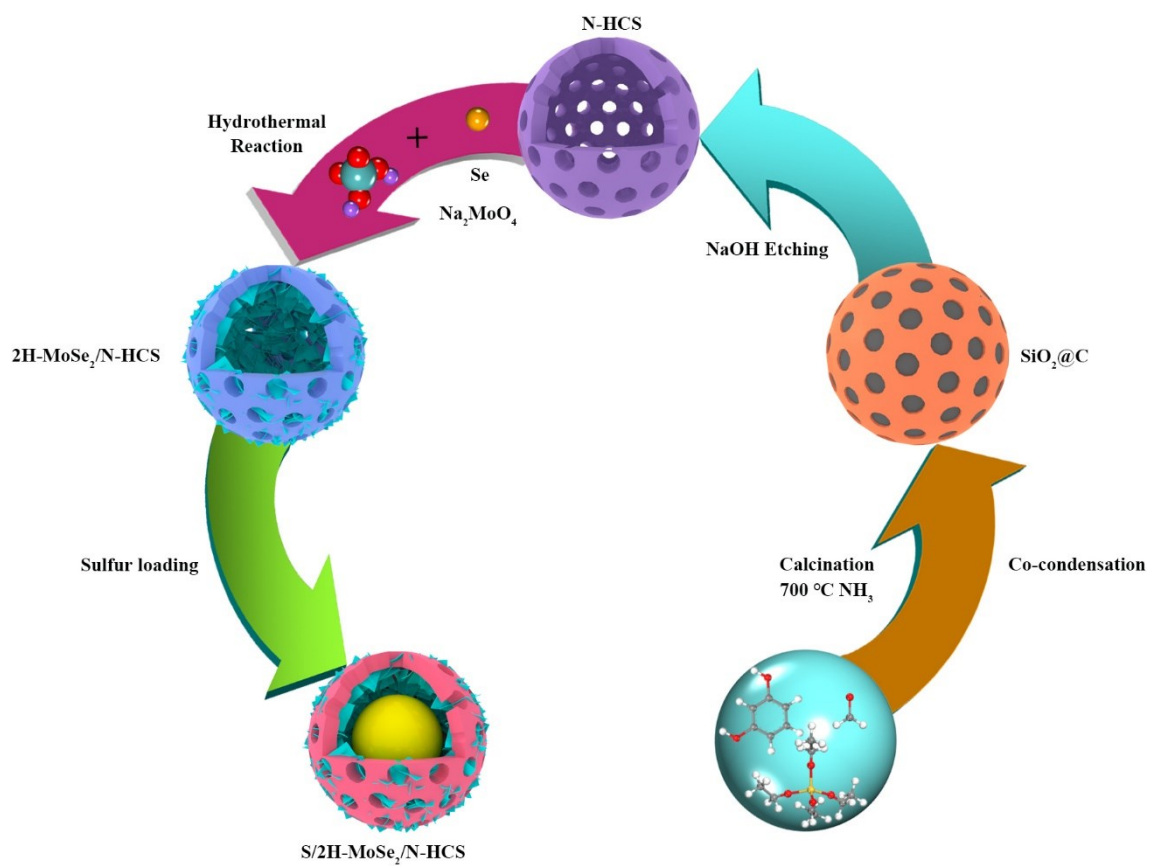

Fig. S4 Schematic illustration of fabrication process of S/2H-MoSe<sub>2</sub>/N-HCS.

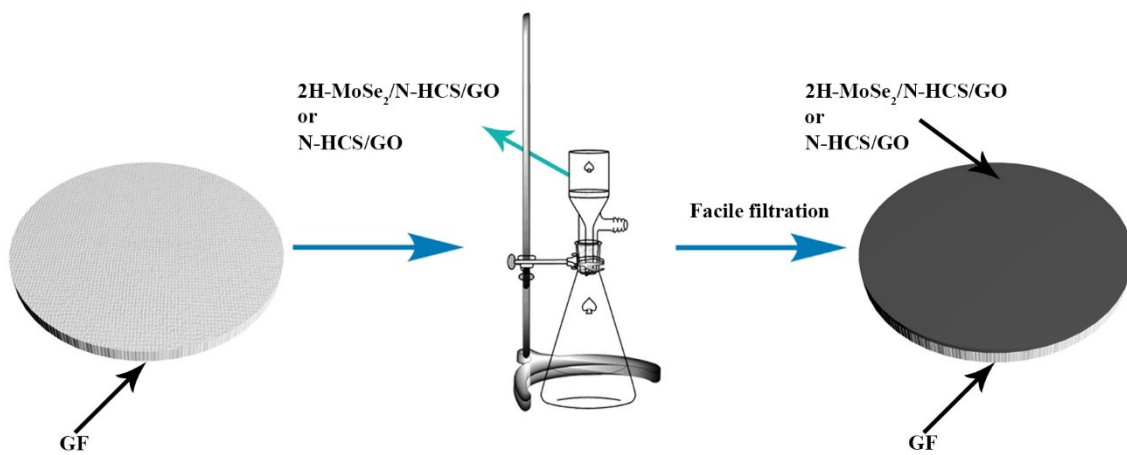

Fig. S5 Fabrication procedure of 2H-MoSe<sub>2</sub>/N-HCS/GO+GF and N-HCS/GO+GF separators.

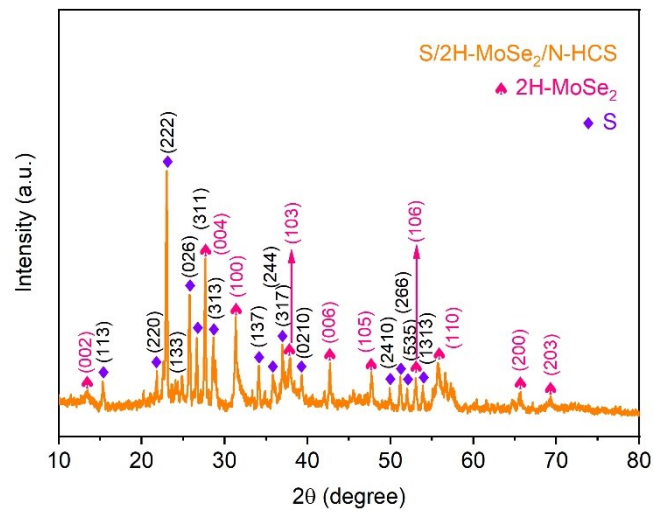

Fig. S6 XRD pattern of S/2H-MoSe<sub>2</sub>/N-HCSs.

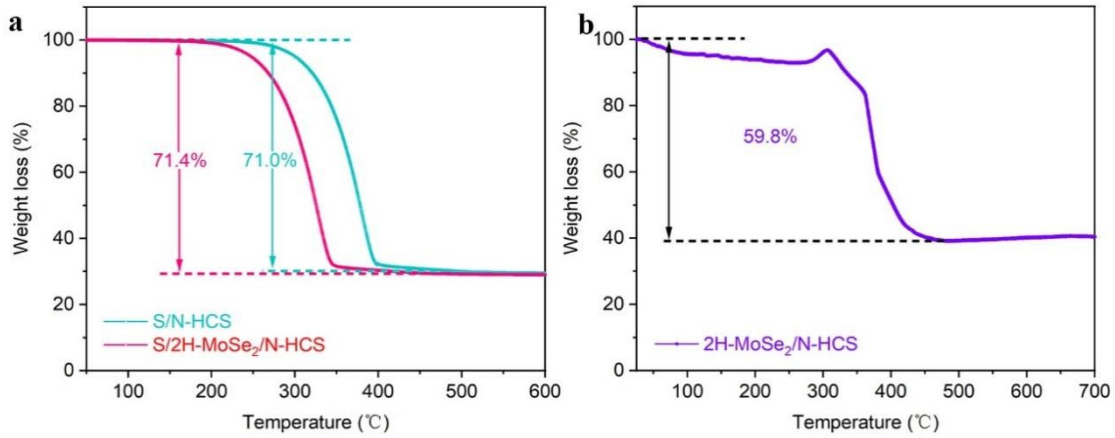

Fig. S7 (a) TGA curves of S/2H-MoSe<sub>2</sub>/N-HCS and S/N-HCS. (b) TGA curve of 2H-MoSe<sub>2</sub>/N-HCS. Normally, when heating, MoSe<sub>2</sub> in air produces MoO<sub>3</sub> and SeO<sub>2</sub> due to the oxidation as follows:

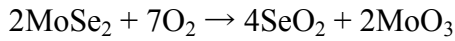

Afterward, the weight decreases due to the sublimation of SeO<sub>2</sub> and the removal of carbon by the oxidation.<sup>1-5</sup> The weight loss of 2H-MoSe<sub>2</sub>/N-HCS is 59.8 wt%. 43.31 wt% weight loss for MoSe<sub>2</sub> is transformed into MoO<sub>3</sub>, and 100 wt% weight loss for C is transformed into CO<sub>2</sub> in air.<sup>6,7</sup> The accurate percentage of MoSe<sub>2</sub> in 2H-MoSe<sub>2</sub>/N-HCS is calculated as follows:

$$M \times 59.8\% = M \times \alpha \times 43.31\% + M \times (1 - \alpha) \times 100\%$$

$M$  and  $\alpha$  are corresponding to the weight of 2H-MoSe<sub>2</sub>/N-HCS and the content of MoSe<sub>2</sub> in the composite, respectively. According to the formula, the content of MoSe<sub>2</sub> in 2H-MoSe<sub>2</sub>/N-HCS is 70.6 wt%.

- 1 D. Xie, X. Xia, Y. Zhong, Y. Wang, D. Wang, X. Wang and J. Tu, *Adv. Energy Mater.*, 2017, **7**, 1601804.
- 2 M. Yousaf, Y. Wang, Y. Chen, Z. Wang, A. Firdous, Z. Ali, N. Mahmood, R. Zou, S. Guo and R. P. S. Han, *Adv. Energy Mater.*, 2019, **9**, 1900567.
- 3 Y. Yi, Z. Sun, C. Li, Z. Tian, C. Lu, Y. Shao, J. Li, J. Sun and Z. Liu, *Adv. Funct. Mater.*, 2020, **30**, 1903878.
- 4 W. Tian, B. Xi, Z. Feng, H. Li, J. Feng and S. Xiong, *Adv. Energy Mater.*, 2019, **9**, 1901896.
- 5 Q. Shen, P. Jiang, H. He, C. Chen, Y. Liu and M. Zhang, *Nanoscale*, 2019, **11**, 13511-13520.
- 6 Z. Luo, J. Zhou, L. Wang, G. Fang, A. Pan and S. Liang, *J. Mater. Chem. A*, 2016, **4**, 15302-15308.
- 7 Y. Wu, M. Xu, X. Chen, S. Yang, H. Wu, J. Pan and X. Xiong, *Nanoscale*, 2016, **8**, 440-450.



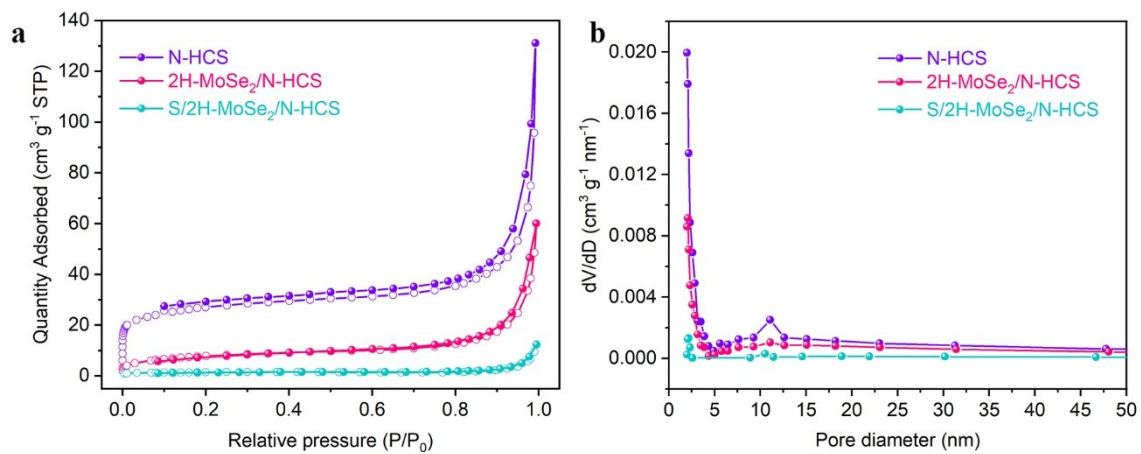

Fig. S8 (a) N<sub>2</sub> adsorption-desorption isotherms and (b) pore size analysis of N-HCS, 2H-MoSe<sub>2</sub>/N-HCS, and S/2H-MoSe<sub>2</sub>/N-HCS.

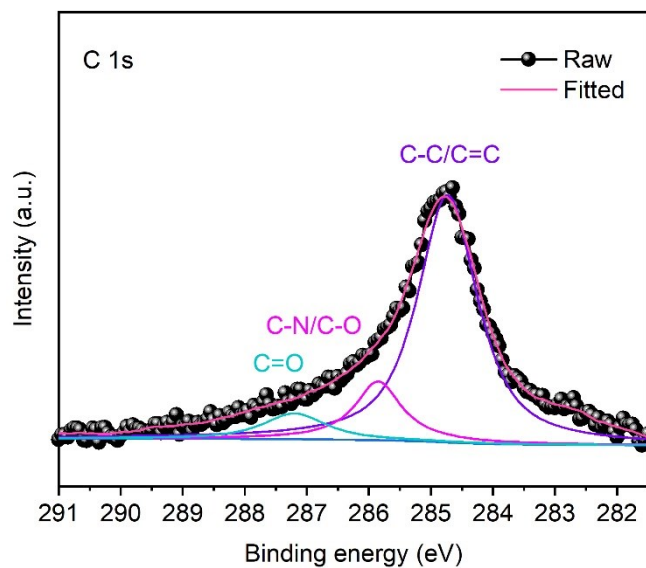

Fig. S9 High-resolution XPS plot of C 1s in 2H-MoSe<sub>2</sub>/N-HCS.

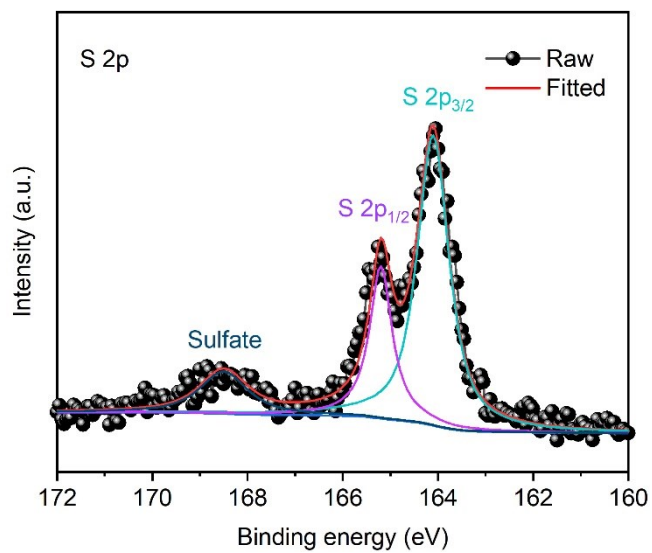

Fig. S10 High-resolution XPS plot of S 2p in S/2H-MoSe<sub>2</sub>/N-HCS before cycling.

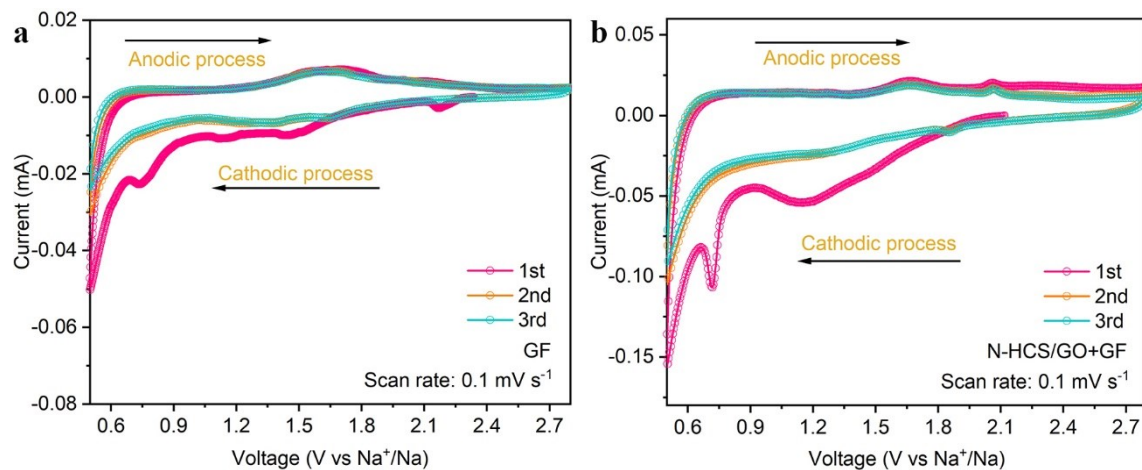

Fig. S11 CV curves of RT-Na/S batteries with (a) pristine GF and (b) N-HCS/GO+GF separators at the voltage range of 0.5 to 2.8 V (vs Na<sup>+</sup>/Na) and scan rate of 0.1 mV s<sup>-1</sup>.

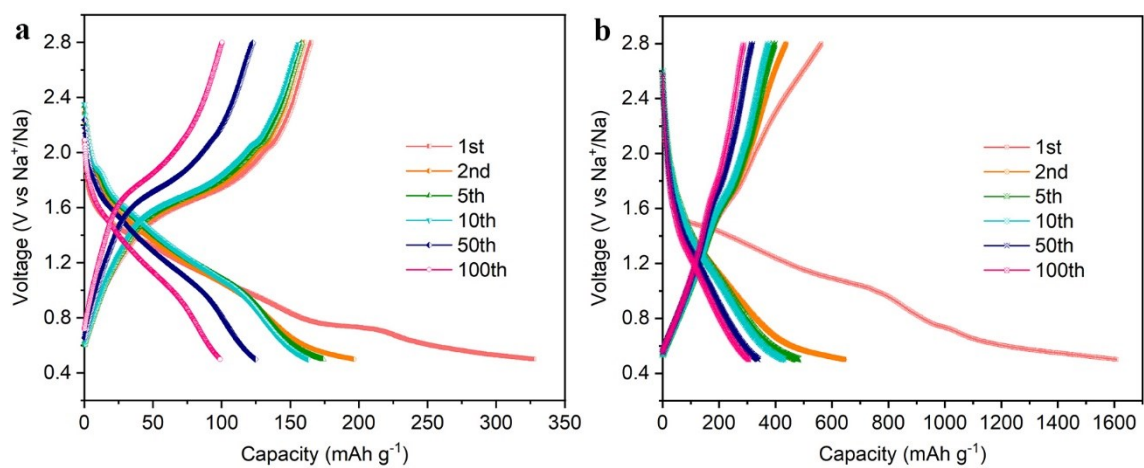

Fig. S12 Charge/discharge profiles of RT-Na/S batteries with (a) pristine GF and (b) N-HCS/GO+GF separators at 0.1 C.

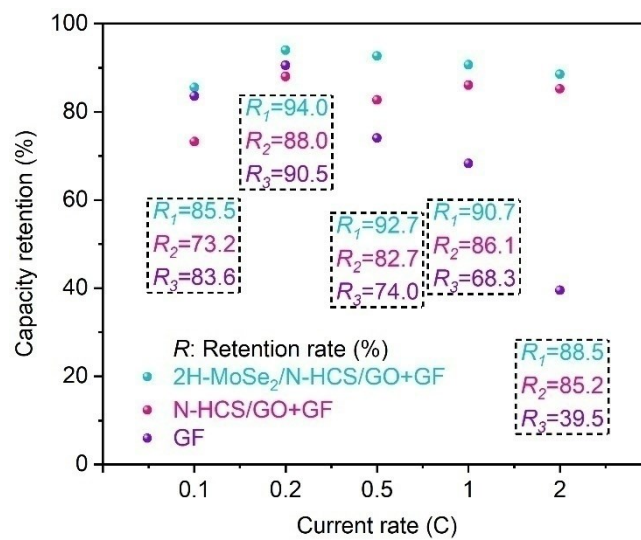

Fig. S13 Capacity retention of RT-Na/S batteries with different separators at different current rates.

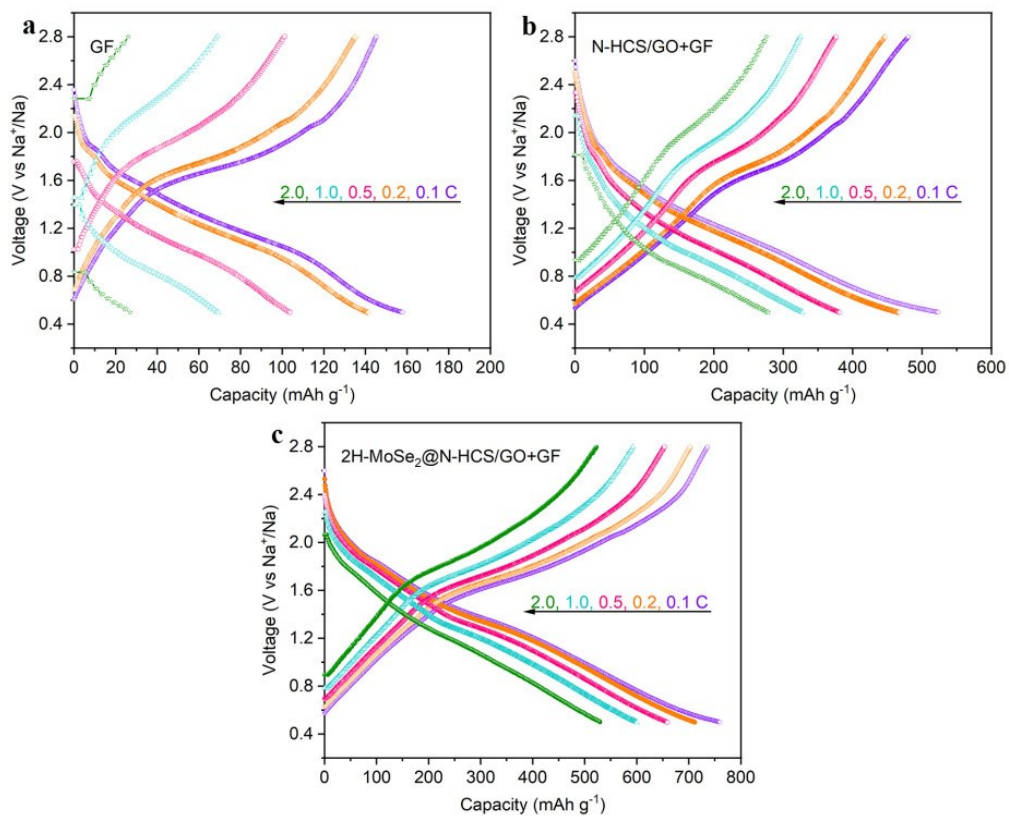

Fig. S14 Charge/discharge curves of RT-Na/S batteries with pristine (a) GF, (b) N-HCS/GO+GF, and (c) 2H-MoSe<sub>2</sub>/N-HCS/GO+GF separators at various current rates.

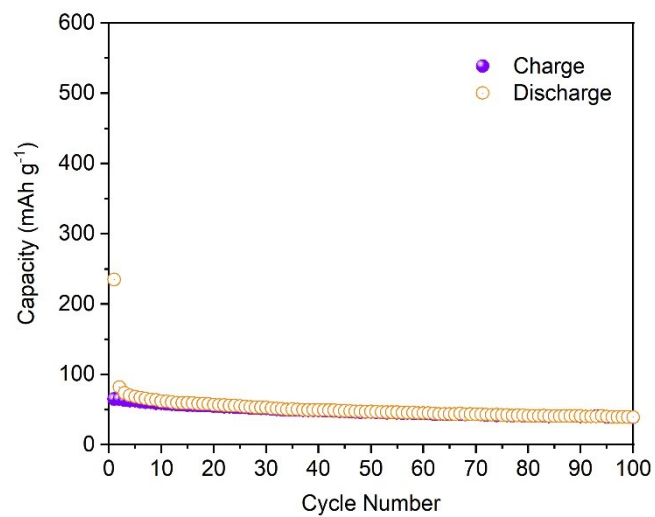

Fig. S15 Cycling performance of MoSe<sub>2</sub> electrode at a current density of 0.5 C.



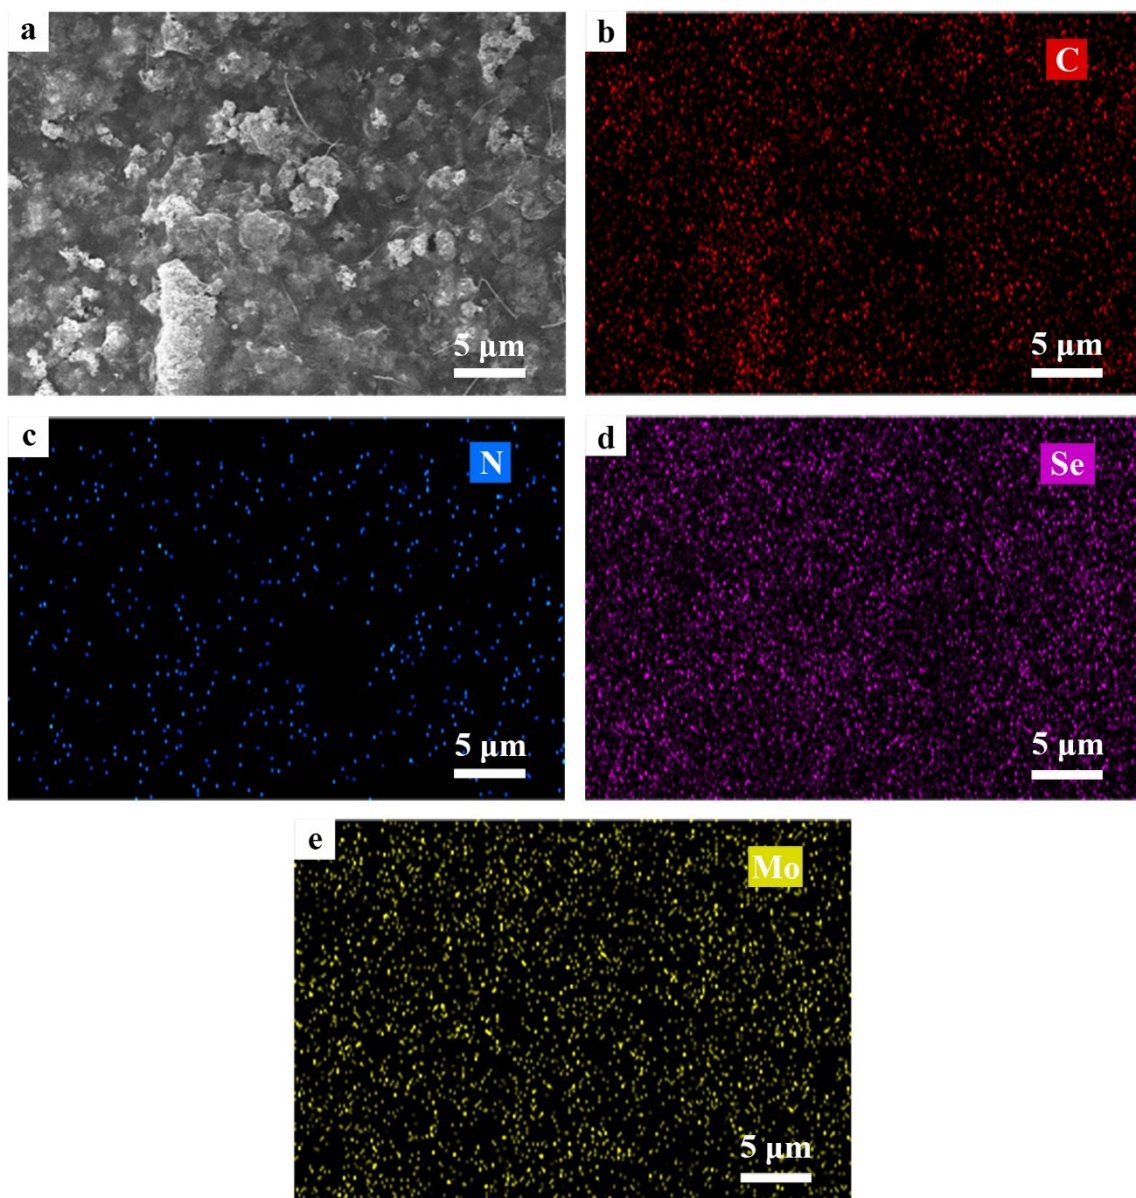

Fig. S16 (a) Low-magnification SEM image of 2H-MoSe<sub>2</sub>/N-HCS/GO+GF separator. The corresponding elemental mappings in a selected region before cycling: (b) C, (c) N, (d) Se, and (e) Mo.

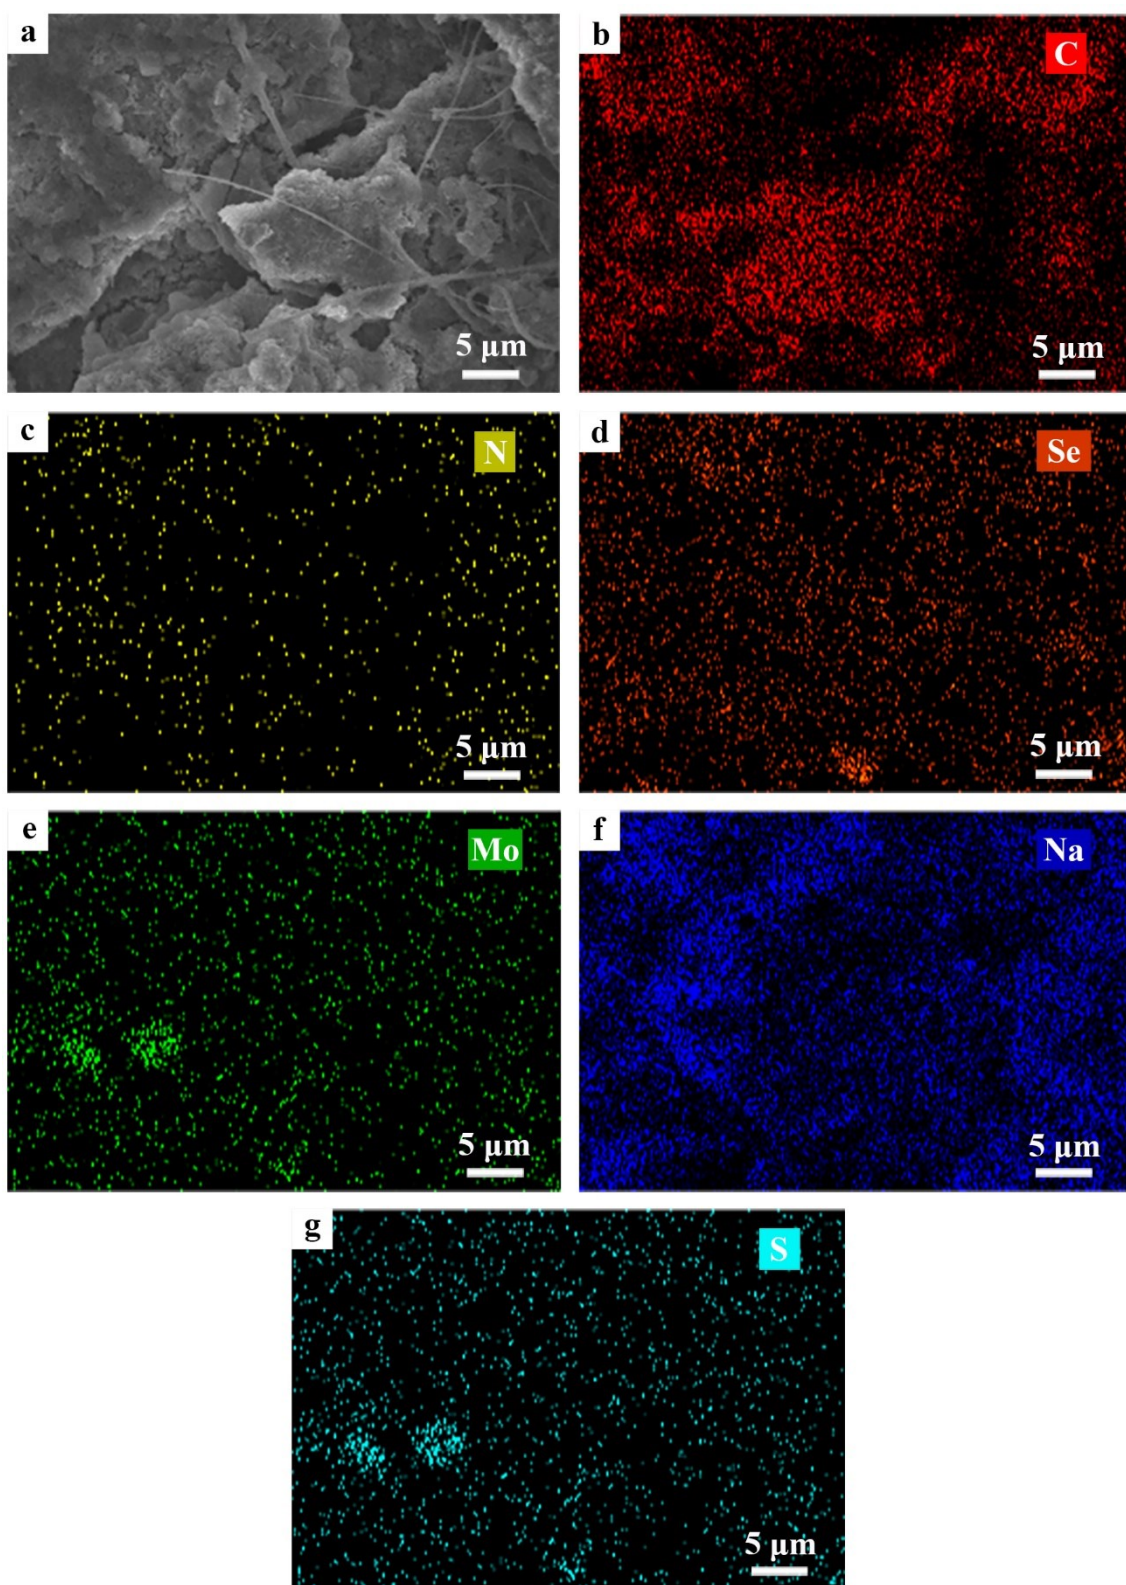

Fig. S17 (a) Low-magnification SEM image of 2H-MoSe<sub>2</sub>/N-HCS/GO+GF separator after cycling. The corresponding elemental mappings: (b) C, (c) N, (d) Se, (e) Mo, (f) Na, and (g) S.

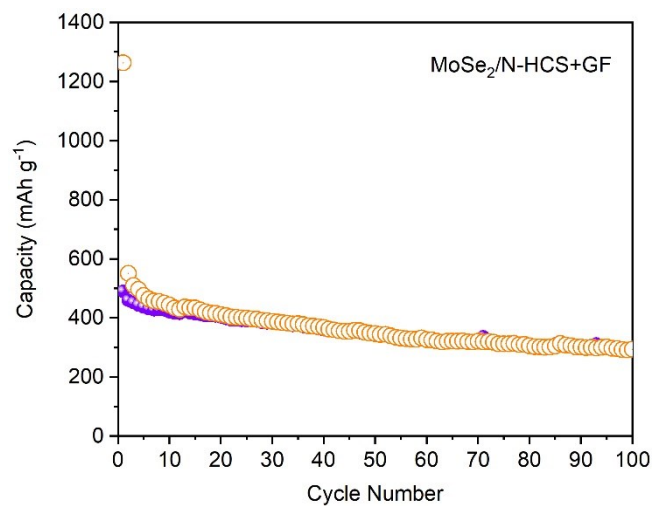

Fig. S18 Cycling performance of a RT-Na/S battery with a 2H-MoSe<sub>2</sub>/N-HCS+GF separator at a current density of 0.5 C.

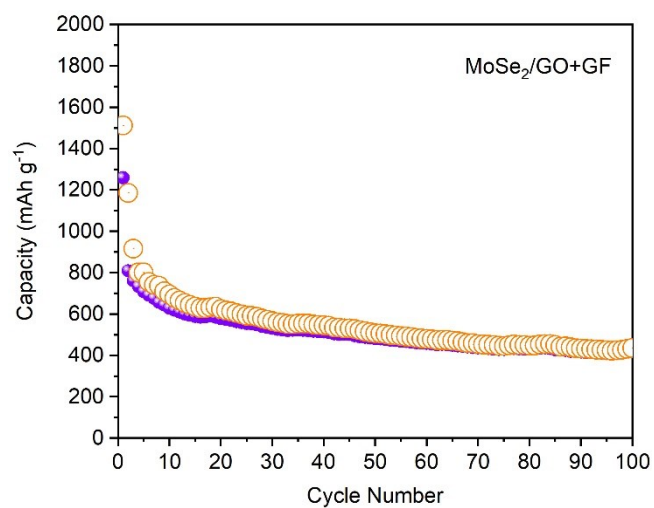

Fig. S19 Cycling performance of a RT-Na/S battery with a MoSe<sub>2</sub>/GO+GF separator at a current density of 0.5 C.

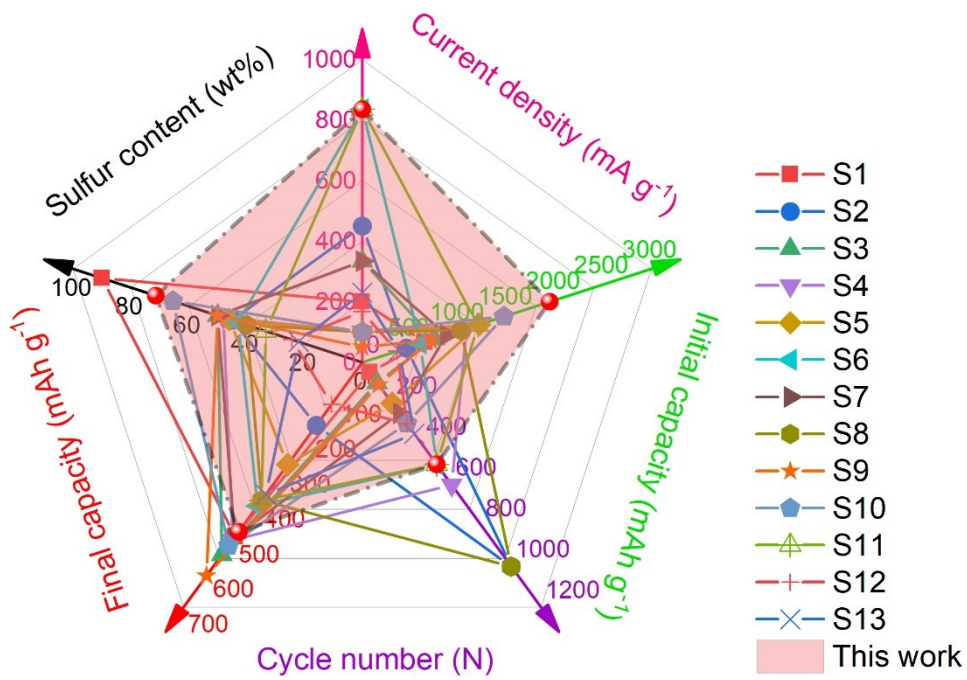

Fig. S20 Comparison of the electrochemical performance of RT-Na/S batteries with other reported literatures.

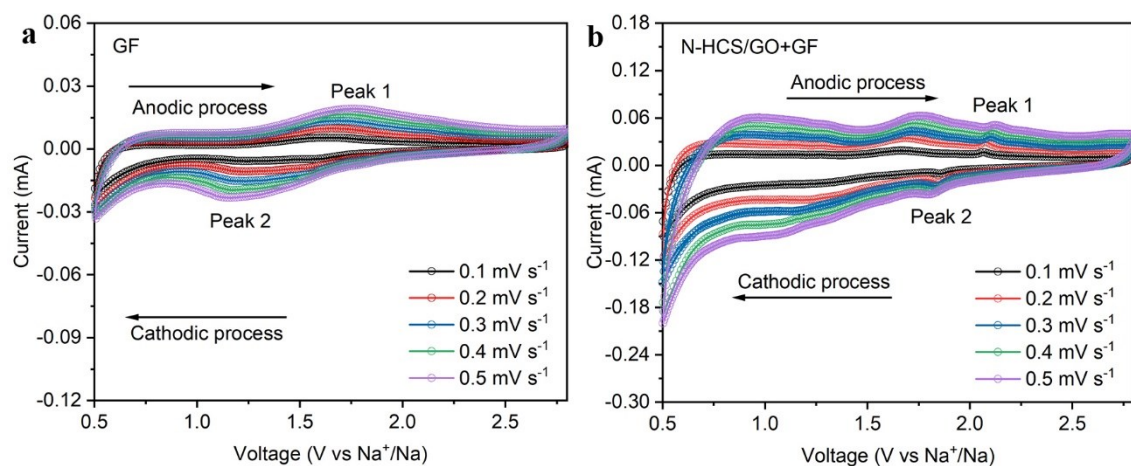

Fig. S21 CV curves of RT-Na/S batteries with (a) pristine GF and (b) N-HCS/GO+GF separators at different scan rates from 0.1 to 0.5 mV s<sup>-1</sup>.

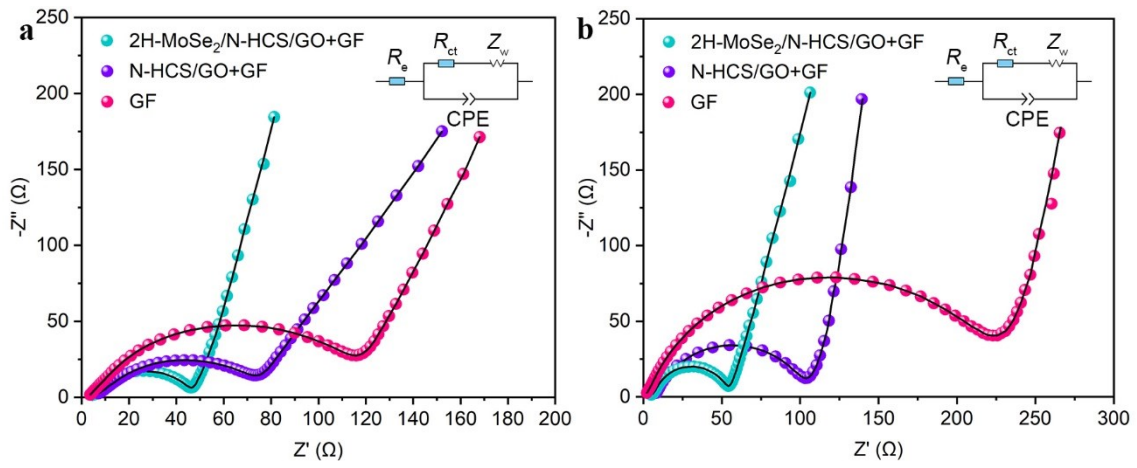

Fig. S22 Nyquist plots of RT-Na/S batteries with different separators (a) before cycling and (b) after ten cycles at 0.1 C (insets: the equivalent electrical circuits).

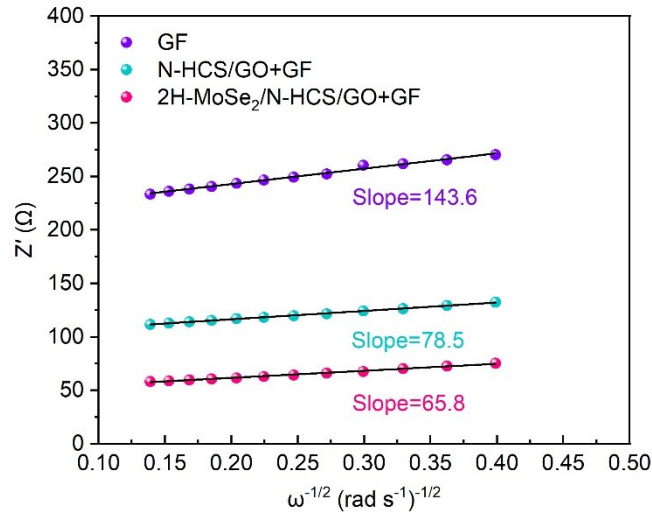

Fig. S23 The relationship plots of RT-Na/S batteries with different separators after cycles between  $Z'$  and  $\omega^{-1/2}$  in the low-frequency region.

The electrochemical impedance spectroscopy was further generalized to analyze the solid-state ion diffusion behaviors by using Nyquist plots in the low-frequency region (Fig. S22b). Na-ion diffusion coefficient was calculated by the following equation:<sup>1-3</sup>

$$D_{\text{Na}^+} = R^2 T^2 / 2A^2 n^4 F^4 C_{\text{Na}}^2 \sigma_{\omega}^2 \quad (1)$$

Where  $R$  is the gas constant,  $T$  represents the absolute temperature,  $A$  is the area of electrode,  $n$  is the number of the transferred electrons,  $F$  is the Faraday constant, and  $C_{\text{Na}}$  is the concentration of sodium-ion. Besides,  $\sigma_{\omega}$  is Warburg coefficient, which is determined as the slope of  $Z'$  versus  $\omega^{-1/2}$  (Fig. S23) in the low-frequency region based on the following equation:

$$Z' = R_e + R_{\text{ct}} + \sigma_{\omega} \omega^{-1/2} \quad (2)$$

Where  $\omega$  is the angular frequency,  $R_e$  is the resistance of electrolyte, and  $R_{\text{ct}}$  is the charge transfer resistance. Na-ion diffusion coefficients of RT-Na/S batteries with GF, N-HCS/GO+GF, and 2H-MoSe<sub>2</sub>/N-HCS/GO+GF separators are  $5.98 \times 10^{-14}$ ,  $2.0 \times 10^{-13}$ , and  $2.84 \times 10^{-13} \text{ cm}^2 \text{ s}^{-1}$ , respectively.  $D_{\text{Na}^+}$  of a RT-Na/S battery with 2H-MoSe<sub>2</sub>/N-HCS/GO+GF separator is higher than those of the other two RT-Na/S batteries with N-HCS/GO+GF and GF separators, indicating its improved rate capability (Fig. 4d).

- 1 A. J. Bard and L. R. Faulkner, *Electrochemical Methods*, Second Ed., Wiley, 2001, 231.
- 2 J. Mou, T. Liu, Y. Li, W. Zhang, M. Li, Y. Xu, J. Huang and M. Liu, *J. Mater. Chem. A*, 2020, **8**, 24590-24597.
- 3 P. Ge, H. Hou, S. Li, L. Yang and X. Ji, *Adv. Funct. Mater.*, 2018, **28**, 1801765.



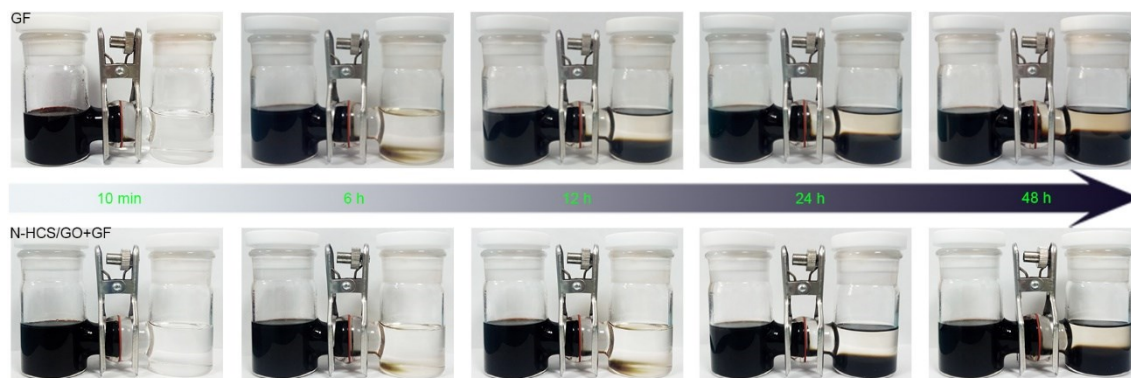

Fig. S24 SPSs permeation measurements in H-type cells with the pristine GF and N-HCS/GO+GF separators after different time.

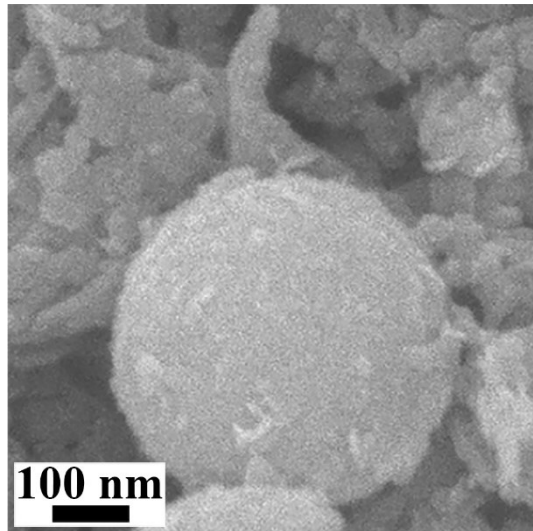

Fig. S25 High-magnification SEM image of S/2H-MoSe<sub>2</sub>/N-HCS after cycles.

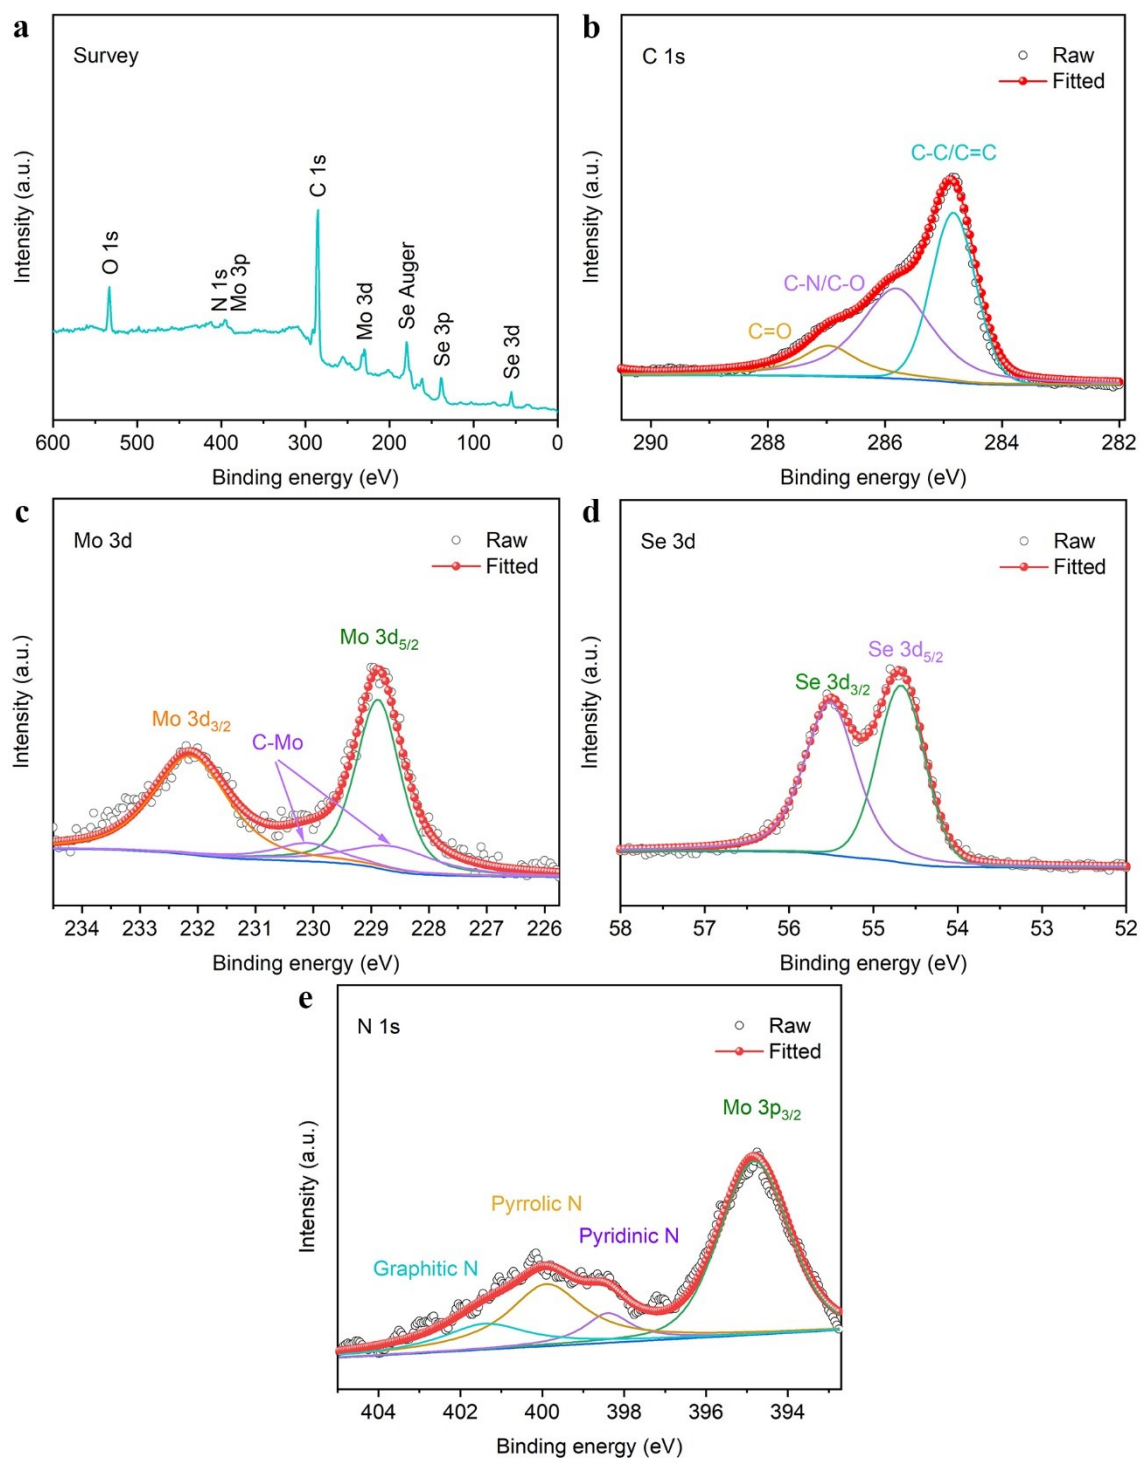

Fig. S26 (a) XPS survey spectrum, (b) C 1s, (c) Mo 3d, (d) Se 3d, and (e) N 1s high-resolution XPS spectra of S/2H-MoSe<sub>2</sub>/N-HCS after cycles.

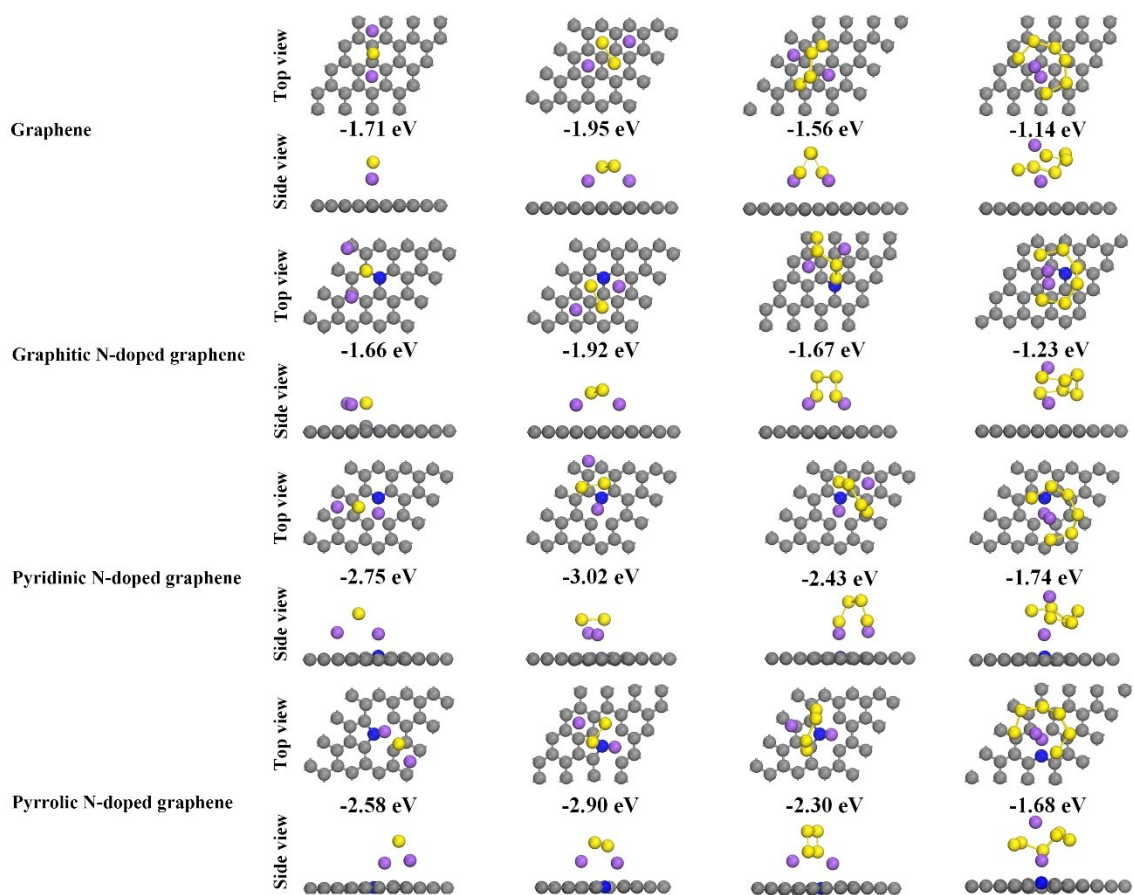

Fig. S27 The optimized configurations and corresponding adsorption energies for binding of  $\text{Na}_2\text{S}$ ,  $\text{Na}_2\text{S}_2$ ,  $\text{Na}_2\text{S}_4$ , and  $\text{Na}_2\text{S}_6$  to graphene and N-doped graphene.

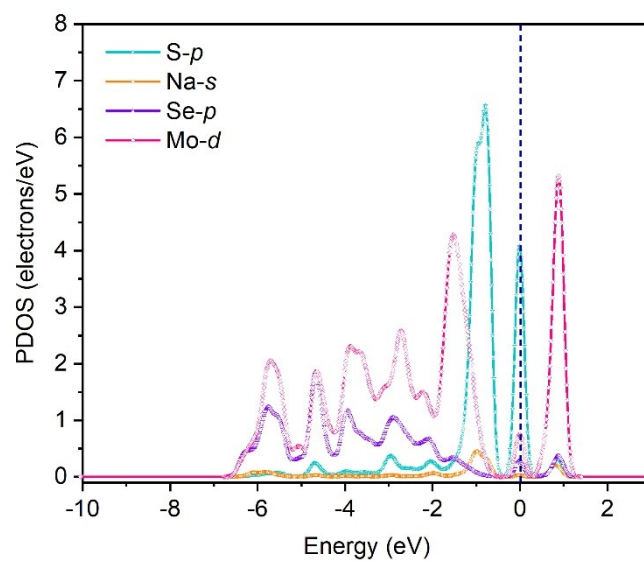

Fig. S28 Partial density of states (PDOS) of Na<sub>2</sub>S adsorbed on MoSe<sub>2</sub>, including Na-*s*, S-*p*, Se-*p*, and Mo-*d* orbitals.

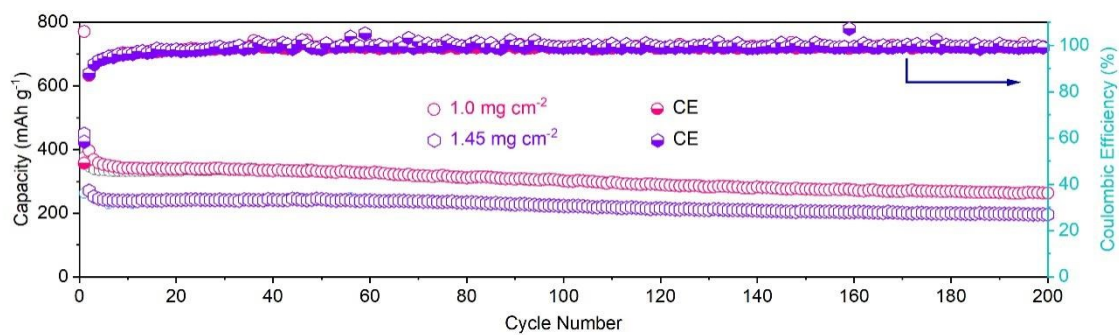

Fig. S29 Cycling performance of RT-Na/S batteries with 2H-MoSe<sub>2</sub>/N-HCS/GO+GF separator at high sulfur loadings at 0.5 C.

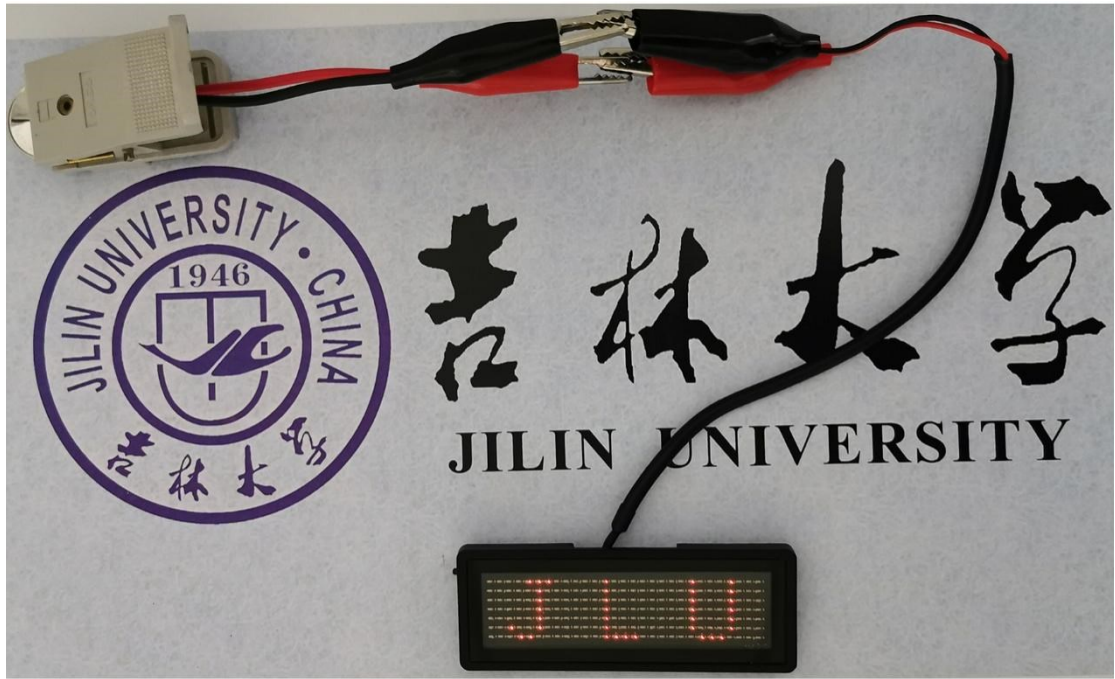

Fig. S30 Photograph of a LED array panel with a “JLU” pattern lighted by a RT-Na/S battery with a 2H-MoSe<sub>2</sub>/N-HCS/GO+GF separator.

Table S1 Comparison of the electrochemical performance between this work and other recently reported literatures for RT-Na/S batteries.

| Cathode material                      | Current density (mA g <sup>-1</sup> ) | Initial capacity (mAh g <sup>-1</sup> ) | Final capacity (mAh g <sup>-1</sup> ) | Cycle number (N) | Sulfur content (wt%) | Ref.             |
|---------------------------------------|---------------------------------------|-----------------------------------------|---------------------------------------|------------------|----------------------|------------------|
| CS90-rGO                              | 200                                   | 650                                     | 498                                   | 50               | ~90                  | S1               |
| MoS <sub>3</sub>                      | 450                                   | 460                                     | ~180                                  | 1000             | 45                   | S2               |
| CNF/AC-Na <sub>2</sub> S <sub>6</sub> | 335                                   | 750                                     | 550                                   | 100              | 50                   | S3               |
| S@Co <sub>n</sub> -HC                 | 100                                   | 1081                                    | 508                                   | 600              | 48                   | S4               |
| S@iMCHS                               | 100                                   | 1215                                    | 292                                   | 200              | 46                   | S5               |
| S@CNT/NPC                             | 837.5                                 | 601                                     | 410                                   | 500              | 43                   | S6               |
| cZIF-8/S                              | 335                                   | 873                                     | 500                                   | 250              | 50                   | S7               |
| S@Fe-HC                               | 100                                   | 1023                                    | 394                                   | 1000             | 40                   | S8               |
| HSMC-Cu-S                             | 50                                    | 710                                     | 610                                   | 110              | 50                   | S9               |
| FeS <sub>2</sub> @NCMS/S              | 100                                   | 1471                                    | 524                                   | 300              | 65.5                 | S10              |
| Microporous carbon/sulfur             | 837.5                                 | 1200                                    | 395                                   | 500              | 33.4                 | S11              |
| CFC/S-2                               | 167.5                                 | 360                                     | 120                                   | 300              | 24.4                 | S12              |
| N, S-HPC/S                            | 230                                   | 381                                     | 378                                   | 350              | 22                   | S13              |
| <b>S/2H-MoSe<sub>2</sub>/N-HCS</b>    | <b>837.5</b>                          | <b>1945</b>                             | <b>484</b>                            | <b>500</b>       | <b>71.4</b>          | <b>This work</b> |

\*Results summarized from Fig. S20 in Supporting Information.

## References

- S1 Ghosh, S. Shukla, M. Monisha, A. Kumar, B. Lochab and S. Mitra, *ACS Energy Lett.*, 2017, **2**, 2478-2485.
- S2 H. L. Ye, L. Ma, Y. Zhou, L. Wang, N. Han, F. P. Zhao, J. Deng, T. P. Wu, Y. G. Li and J. Lu, *PNAS*, 2017, **114**, 13091-13096.
- S3 X. W. Yu and A. Manthiram, *Adv. Energy Mater.*, 2015, **5**, 1500350.



- S4 B. W. Zhang, T. Sheng, Y. D. Liu, Y. X. Wang, L. Zhang, W. H. Lai, L. Wang, J. P. Yang, Q. F. Gu, S. L. Chou, H. K. Liu and S. X. Dou, *Nat. Commun.*, 2018, **9**, 4082.
- S5 Y. X. Wang, J. P. Yang, W. H. Lai, S. L. Chou, Q. F. Gu, H. K. Liu, D. Y. Zhao and S. X. Dou, *J. Am. Chem. Soc.*, 2016, **138**, 16576-16579.
- S6 T. T. Yang, W. Gao, B. S. Guo, R. M. Zhan, Q. J. Xu, H. He, S. J. Bao, X. Y. Li, Y. M. Chen and M. W. Xu, *J. Mater. Chem. A*, 2019, **7**, 150-156.
- S7 Y. M. Chen, W. F. Liang, S. Li, F. Zou, S. M. Bhaway, Z. Qiang, M. Gao, B. D. Vogt and Y. Zhu, *J. Mater. Chem. A*, 2016, **4**, 12471-12478.
- S8 B. W. Zhang, T. Sheng, Y. X. Wang, S. L. Chou, K. Davey, S. X. Dou and S. Z. Qiao, *Angew. Chem.*, 2019, **131**, 1498-1502.
- S9 S. Y. Zheng, P. Han, Z. Han, P. Li, H. J. Zhang and J. H. Yang, *Adv. Energy Mater.*, 2014, **4**, 1400226.
- S10 Z. C. Yan, Y. R. Liang, J. Xiao, W. H. Lai, W. L. Wang, Q. B. Xia, Y. X. Wang, Q. F. Gu, H. M. Lu, S. L. Chou, Y. Liu, H. K. Liu and S. X. Dou, *Adv. Mater.*, 2020, **32**, 1906700.
- S11 V. Kumar, A. Y. S. Eng, Y. Wang, D. T. Nguyen, M. F. Ng and Z. W. Seh, *Energy Storage Mater.*, 2020, **29**, 1-8.
- S12 Q. Q. Lu, X. Y. Wang, J. Cao, C. Chen, K. N. Chen, Z. F. Zhao, Z. Q. Niu and J. Chen, *Energy Storage Mater.*, 2017, **8**, 77-84.
- S13 Z. Qiang, Y. M. Chen, Y. F. Xia, W. F. Liang, Y. Zhu and B. D. Vogt, *Nano Energy*, 2017, **32**, 59-66.

Table S2 The values of  $R_{ct}$  of RT-Na/S batteries with different separators before cycling and after cycles.

| <b>Separator</b>                  | <b><math>R_{ct}</math> (<math>\Omega</math>)<br/>Before cycling</b> | <b><math>R_{ct}</math> (<math>\Omega</math>)<br/>After ten cycles</b> |
|-----------------------------------|---------------------------------------------------------------------|-----------------------------------------------------------------------|
| 2H-MoSe <sub>2</sub> /N-HCS/GO+GF | 41.32                                                               | 49.25                                                                 |
| N-HCS/GO+GF                       | 66.51                                                               | 95.97                                                                 |
| GF                                | 112.41                                                              | 221.32                                                                |
